# Supplementary material for: Genome-Wide Analysis of the WRKY Gene Family in Malus domestica and the Role of MdWRKY70L in Response to Drought and Salt Stresses
Source: MDPI journal article supplement (doi:10.3390/genes13061068), 2022-06-15
Supplement: s1 [file s1]

**Supplementary Table S1.** Primers information and sequences in this study.

| Name                | Purpose/Vector | Primer sequences (5'-3')                                                                         |
|---------------------|----------------|--------------------------------------------------------------------------------------------------|
| <i>MD03G1057400</i> | Clone          | F: ATGGCCTCCTCTTCAGGG<br>R: ATGGCCTCCTCTTCAGGG                                                   |
| <i>MD17G1223100</i> |                | F: ATGGACCATTTCAGCTGCATATGATG<br>R: CAGTCTAACAAGTGAAACACCAATG                                    |
| <i>MD08G1127200</i> |                | F: ATGACGGTGGAGCTGATGGAAT<br>R: TCACGTTGACTCGTACACCAAC                                           |
| <i>MD09G1150700</i> |                | F: CTCATCTTCTTCTACCATGTCAAAT<br>R: GCCCGCCAATCGACTCGAAAA                                         |
| <i>MD00G1140800</i> |                | F: ATGGATGAAACCTTTCTCCAGAAC<br>R: TCAAGAAGGGACAGAGGGAATCCTT                                      |
| <i>MD15G1106600</i> |                | F: ATGGCGGTGGAGCTGATGAACTTC<br>R: TCACGTCGACTCAGACACCAAC                                         |
| <i>MD01G1168600</i> |                | F: TCAAGAAGGGACAGAGGGAATCCTT<br>R: CATCACTGCGAGGAGTTCATAGGAA                                     |
| <i>MD03G1057400</i> | 2300-EGFP      | F: CGAGCTCGGTACCCGGGGATCCATGGCCTCCTCTTCAGGGAG<br>R: CCTTGCTCACCATGGTGTCTGACGCACAGCAATGATTCAAAAA  |
| <i>MD17G1223100</i> |                | F: CGAGCTCGGTACCCGGGGATCCATGGACCATTTCAGCTGCATA<br>R: CGAGCTCGGTACCCGGGGATCCATGGACCATTTCAGCTGCATA |
| <i>MD08G1127200</i> |                | F: CGAGCTCGGTACCCGGGGATCCATGACGGTGGAGCTGATGGA<br>R: CGAGCTCGGTACCCGGGGATCCATGACGGTGGAGCTGATGGA   |
| <i>MD09G1150700</i> |                | F: CGAGCTCGGTACCCGGGGATCCATGTCAAATGAGAAGAAAAA<br>R: CCTTGCTCACCATGGTGTCTGACTGGCTCTTTTTTGTGACTAA  |
| <i>MD00G1140800</i> |                | F: CCTTGCTCACCATGGTGTCTGACTGGCTCTTTTTTGTGACTAA<br>R: CCTTGCTCACCATGGTGTCTGACAGAAGGGACAGAGGGAATCC |
| <i>MD15G1106600</i> |                | F: CGAGCTCGGTACCCGGGGATCCATGGCGGTGGAGCTGATGAA<br>R: CCTTGCTCACCATGGTGTCTGACCGTCGACTCAGACACCAACC  |
| <i>MD01G1168600</i> |                | F: CCTTGCTCACCATGGTGTCTGACAGAAGGGACAGAGGGAATCC<br>R: CCTTGCTCACCATGGTGTCTGACTAGGAACTCTCAAAATTAA  |
| <i>MD01G1168600</i> | qRT-PCR        | F: TGCTGTCGGAGATGAGATAA<br>R: TTTGGTGCTTTCAGATCCCT                                               |
| <i>MDH</i>          |                | F: CGTGATTGGGTACTTGGAAC<br>R: TGGCAAGTGACTGGGAATGA                                               |

**Supplementary Table S2.** Synteny relationship of *WRKY* genes between *Arabidopsis* and *Malus domestica*.

| Pairs 1   |              | Pairs 2   |              | Pairs 3   |              |
|-----------|--------------|-----------|--------------|-----------|--------------|
| AtWRKYs   | MdWRKYs      | AtWRKYs   | MdWRKYs      | AtWRKYs   | MdWRKYs      |
| AT5G15130 | MD17G1048400 | AT1G80840 | MD09G1224500 | AT3G04670 | MD04G1226400 |
| AT4G39410 | MD15G1337100 | AT3G01970 | MD09G1008800 | AT5G28650 |              |
| AT4G31550 | MD15G1106600 | AT5G13080 |              | AT2G37260 | MD04G1113100 |
| AT4G31800 | MD15G1039500 | AT2G24570 | MD08G1127200 | AT4G26640 | MD03G1188900 |
| AT2G25000 |              | AT5G24110 | MD07G1285200 | AT2G23320 | MD02G1177500 |
| AT5G49520 | MD13G1150700 | AT2G44745 | MD07G1110400 | AT4G30935 | MD02G1007900 |
| AT2G03340 | MD13G1067600 | AT4G11070 | MD06G1104100 | AT5G52830 | MD01G1210200 |
| AT1G13960 |              | AT4G23810 |              | AT2G40750 | MD01G1168600 |
| AT1G69310 | MD13G1064700 | AT4G22070 | MD05G1349800 | AT3G56400 |              |
| AT2G38470 | MD12G1181000 | AT4G04450 |              | AT2G40740 | MD01G1168500 |
| AT2G30250 | MD11G1059400 | AT1G62300 |              | AT2G46400 | MD01G1078000 |
| AT4G18170 | MD10G1266400 | AT1G29280 | MD05G1295700 | AT2G46130 | MD01G1071600 |
| AT2G47260 | MD09G1285400 | AT1G29860 | MD05G1290300 | AT4G01250 | MD01G1071300 |

Note: the synteny relationship existed between AtWRKYs and MdWRKYs in Pairs 1, 2 and 3.

Supplementary Table S3. Conserved motifs found in the MdWRKY proteins via MEME.

| Moti<br>f | Widt<br>h | E-value   | Logo |
|-----------|-----------|-----------|------|
| 1         | 23        | 4.7e-1680 |      |
| 2         | 29        | 3.0e-2049 |      |
| 3         | 8         | 3.4e-695  |      |
| 4         | 31        | 8.7e-423  |      |
| 5         | 15        | 6.0e-244  |      |
| 6         | 15        | 6.9e-154  |      |

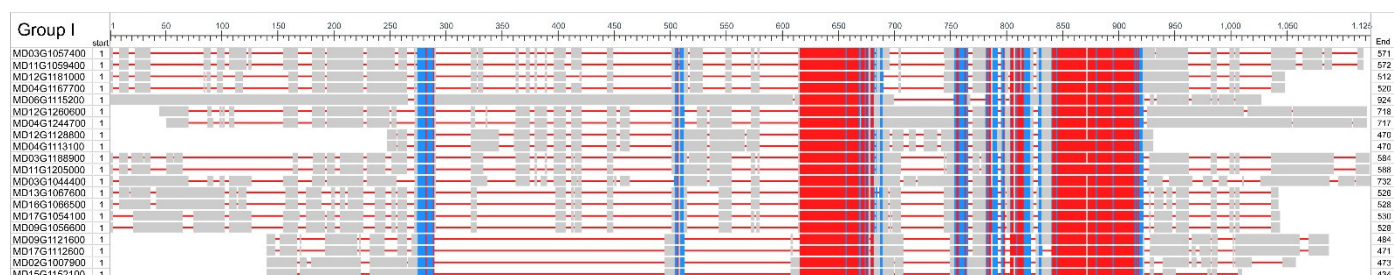

**Supplementary Figure S1.** Multiple alignment of MdWRKYs in group I. Only the highly conserved and less conserved amino acid positions were highlighted based on the relative entropy threshold of the residue. Only alignment positions with no gaps will be colored. Red box indicated highly conserved positions and blue box indicated lower conservation, grey box indicated nonconserved positions, and red line indicated gaps.

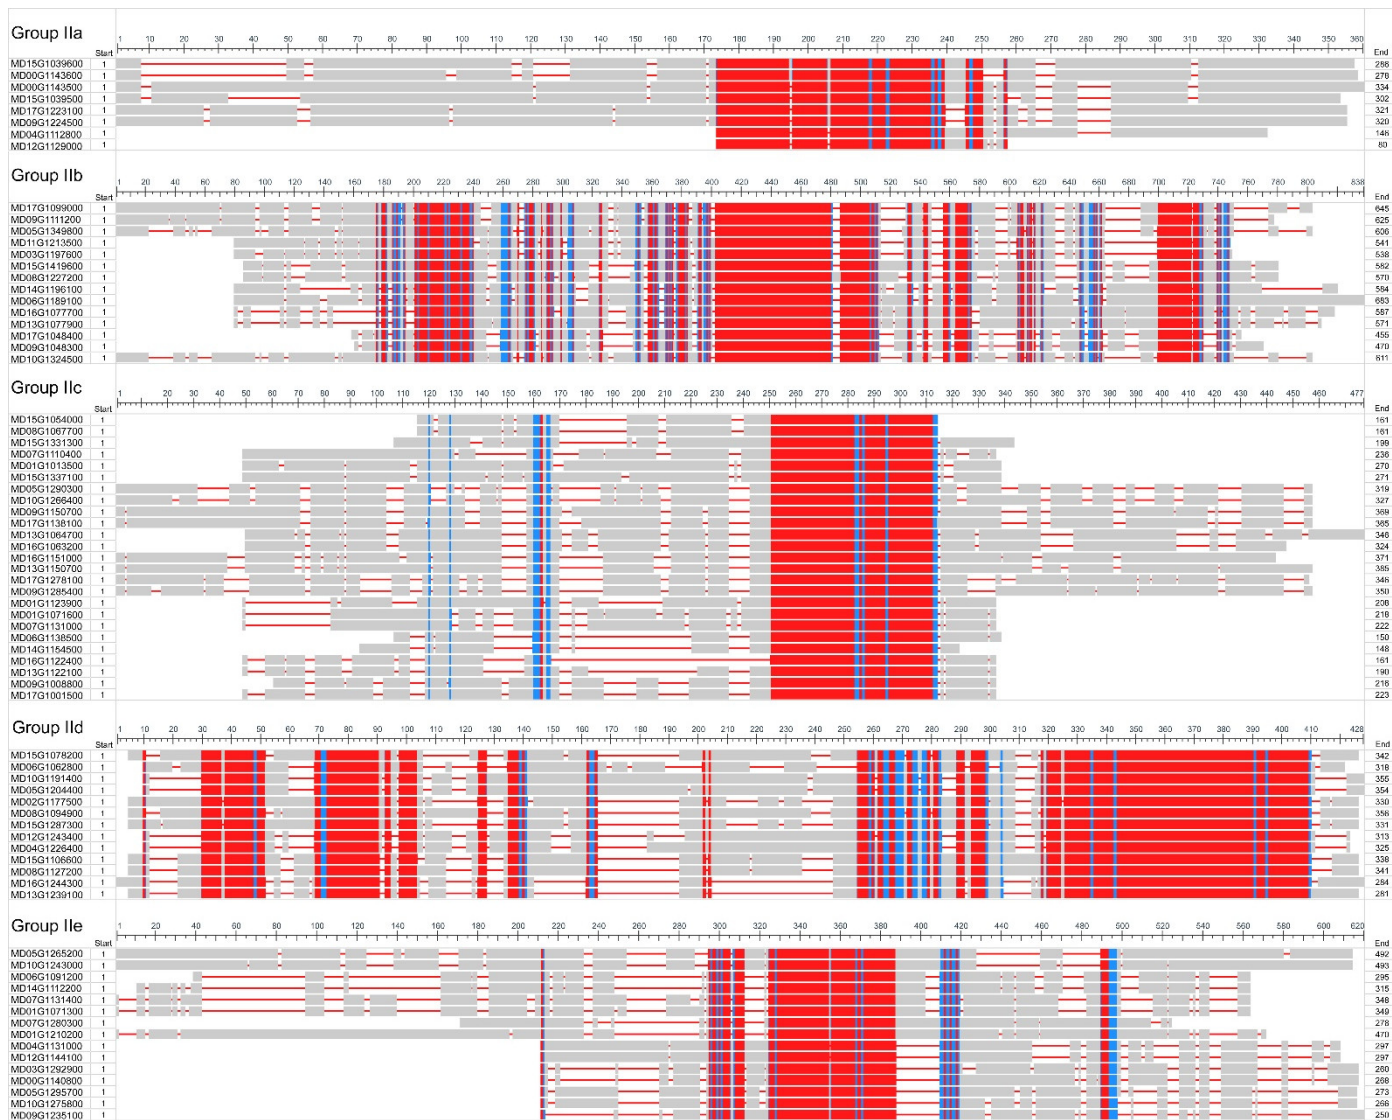

**Supplementary Figure S2.** Multiple alignment of MdWRKYs in group II. Only the highly conserved and less conserved amino acid positions were highlighted based on the relative entropy threshold of the residue. Only alignment positions with no gaps will be colored. Red box indicated highly conserved positions and blue box indicated lower conservation, grey box indicated nonconserved positions, and red line indicated gaps.

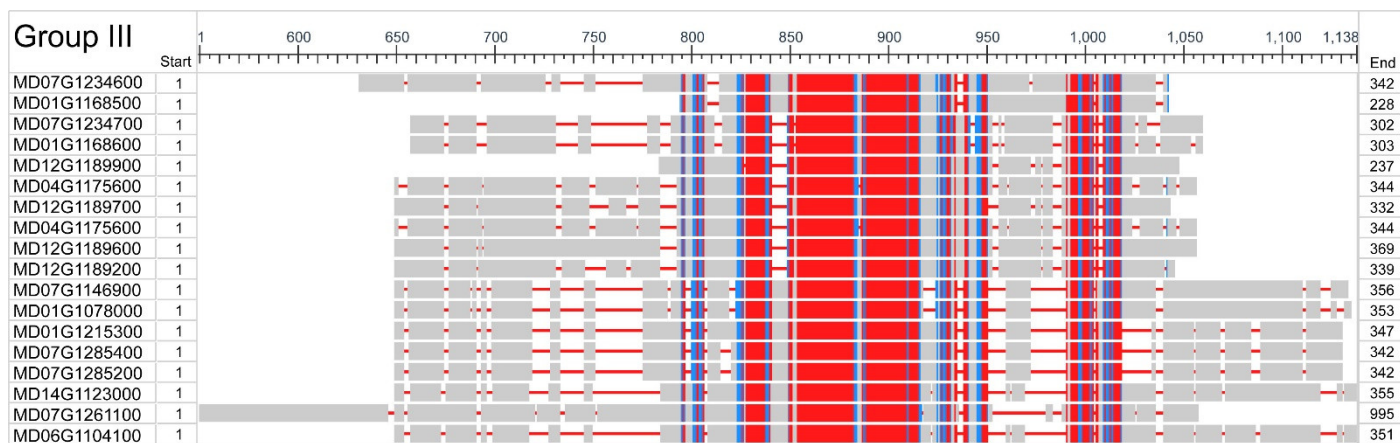

**Supplementary Figure S3:** Multiple alignment of MdWRKYs in group III. Only the highly conserved and less conserved amino acid positions were highlighted based on the relative entropy threshold of the residue. Only alignment positions with no gaps will be colored. Red box indicated highly conserved positions and blue box indicated lower conservation, grey box indicated nonconserved positions, and red line indicated gaps.

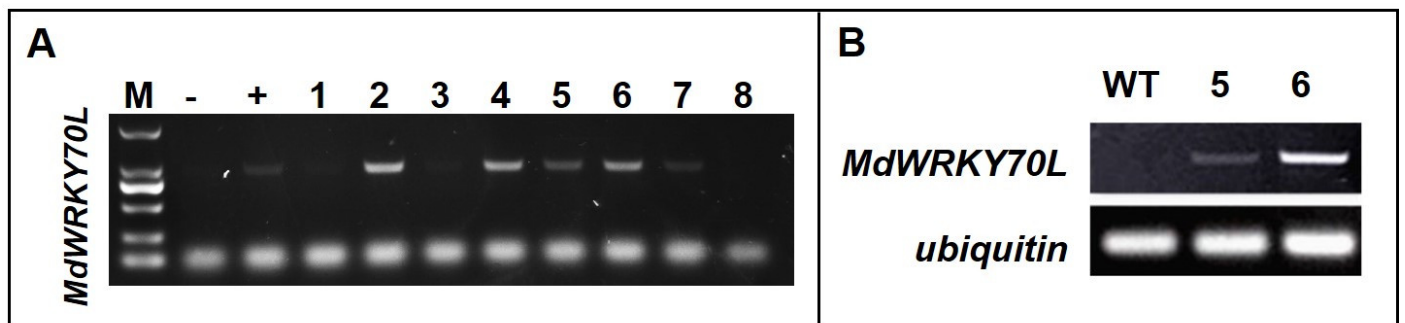

**Supplementary Figure S4.** Identification of transgenic tobacco plants. (A) PCR analysis of the regenerated tobacco by gene specific primers. (B) Expression analysis of *MdWRKY70L* in the transgenic tobacco and wild type (WT).
